# Supplementary material for: Metabolic Reprogramming of Macrophages upon In Vitro Incubation with Aluminum-Based Adjuvant
Source: MDPI journal article supplement (doi:10.3390/ijms24054409), 2023-02-23
Supplement: s1 [file s1]

**Table S1. Relative lactate dehydrogenase (LDH) activity in conditioned culture medium from M0, M1 and M2 macrophages of the individual donors after incubation with increasing concentrations of Alhydrogel® and PS beads. SFM stands for medium control.**

**Incubation with Alhydrogel®**

| <b>M0</b>               | <b>Donor</b> |      |      |      |      |      |      |
|-------------------------|--------------|------|------|------|------|------|------|
| Conc Alhydrogel (µg/ml) | 1            | 2    | 3    | 4    | 5    | 6    | 7    |
| 0 (SFM)                 | 1.00         | 1.00 | 1.00 | 1.00 | 1.00 | 1.00 | 1.00 |
| 2.5                     | 0.90         | 1.04 | 1.10 | 0.95 | 1.12 | 0.93 | 0.97 |
| 5                       | 0.96         | 1.35 | 1.09 | 1.00 | 1.34 | 1.09 | 1.01 |
| 10                      | 1.70         | 2.34 | 1.61 | 1.03 | 2.12 | -    | -    |
| <b>M1</b>               | <b>Donor</b> |      |      |      |      |      |      |
| Conc Alhydrogel (µg/ml) | 1            | 2    | 3    | 4    | 5    | 6    | 7    |
| 0 (SFM)                 | 1.00         | 1.00 | 1.00 | 1.00 | 1.00 | 1.00 | 1.00 |
| 2.5                     | 0.93         | 1.05 | 1.02 | 0.96 | 0.88 | 1.05 | 1.03 |
| 5                       | 1.49         | 1.99 | 1.19 | 1.16 | 0.86 | 1.27 | 1.36 |
| 10                      | 2.59         | 2.91 | 1.69 | 1.12 | 1.22 | -    | -    |
| <b>M2</b>               | <b>Donor</b> |      |      |      |      |      |      |
| Conc Alhydrogel (µg/ml) | 1            | 2    | 3    | 4    | 5    | 6    | 7    |
| 0 (SFM)                 | 1.00         | 1.00 | 1.00 | 1.00 | 1.00 | 1.00 | 1.00 |
| 2.5                     | 0.74         | 0.94 | 0.96 | 0.91 | 1.10 | 1.05 | 0.99 |
| 5                       | 0.76         | 1.11 | 1.01 | 0.90 | 1.21 | 1.29 | 1.10 |
| 10                      | 1.39         | 2.74 | 1.59 | 0.98 | 2.21 | -    | -    |

**Incubation with PS beads**

| <b>M0</b>             | <b>Donor</b> |      |      |      |      |
|-----------------------|--------------|------|------|------|------|
| Conc PS beads (µg/ml) | 1            | 2    | 3    | 4    | 5    |
| 0 (SFM)               | 1.00         | 1.00 | 1.00 | 1.00 | 1.00 |
| 10                    | 0.83         | 0.99 | 0.92 | 0.92 | 0.95 |
| 20                    | 0.92         | 1.22 | 0.93 | 0.92 | 1.17 |
| 40                    | -            | 1.28 | 0.97 | 1.27 | 1.20 |
| <b>M1</b>             | <b>Donor</b> |      |      |      |      |
| Conc PS beads (µg/ml) | 1            | 2    | 3    | 4    | 5    |
| 0 (SFM)               | 1.00         | 1.00 | 1.00 | 1.00 | 1.00 |
| 10                    | 0.89         | 1.06 | 1.10 | 0.88 | 1.23 |
| 20                    | 1.03         | 1.32 | 1.12 | 1.07 | 1.13 |
| 40                    |              | 1.99 | 1.26 | 1.41 | 1.43 |
| <b>M2</b>             | <b>Donor</b> |      |      |      |      |
| Conc PS beads (µg/ml) | 1            | 2    | 3    | 4    | 5    |
| 0 (SFM)               | 1.00         | 1.00 | 1.00 | 1.00 | 1.00 |
| 10                    | 0.90         | 0.97 | 1.01 | 0.90 | 1.30 |
| 20                    | 0.88         | 1.27 | 1.01 | 0.93 | 1.51 |
| 40                    | -            | 1.22 | 0.92 | 1.48 | 1.57 |

**Table S2. Lactate concentrations ( $\mu\text{M}$ ) of M0, M1 and M2 macrophages from donors 1-9 after incubation with increasing concentrations of Alhydrogel®. SFM stands for medium control.**

| <b>M0</b>                            | <b>Donor 1-9 (lactate (<math>\mu\text{M}</math>))</b> |      |      |       |      |      |      |     |     |
|--------------------------------------|-------------------------------------------------------|------|------|-------|------|------|------|-----|-----|
| Conc Alhydrogel ( $\mu\text{g/ml}$ ) | 1                                                     | 2    | 3    | 4     | 5    | 6    | 7    | 8   | 9   |
| 0 (SFM)                              | 39.8                                                  | 29.7 | 10.0 | 80.1  | 26.2 | 13.0 | 39.3 | 5.2 | 7.5 |
| 2.5                                  | 33.2                                                  | 29.2 | 13.8 | 114.9 | 41.2 | 14.5 | 72.2 | 0.9 | 8.3 |
| 5                                    | 55.7                                                  | 39.9 | 36.5 | 89.6  | 31.4 | 18.8 | 57.1 | 1.8 | 6.7 |

| <b>M1</b>                            | <b>Donor 1-9 (lactate (<math>\mu\text{M}</math>))</b> |      |      |      |      |      |      |     |      |
|--------------------------------------|-------------------------------------------------------|------|------|------|------|------|------|-----|------|
| Conc Alhydrogel ( $\mu\text{g/ml}$ ) | 1                                                     | 2    | 3    | 4    | 5    | 6    | 7    | 8   | 9    |
| 0 (SFM)                              | 23.1                                                  | 20.0 | 7.6  | 74.3 | 24.9 | 16.8 | 37.0 | 3.7 | 10.2 |
| 2.5                                  | 43.1                                                  | 29.0 | 18.7 | 99.6 | 23.1 | 13.2 | 39.7 | 9.9 | 24.0 |
| 5                                    | 54.1                                                  | 40.7 | 40.0 | 90.6 | 35.6 | 23.6 | 71.1 | 5.5 | 14.2 |

| <b>M2</b>                            | <b>Donor 1-9 (lactate (<math>\mu\text{M}</math>))</b> |      |      |       |       |      |       |     |      |
|--------------------------------------|-------------------------------------------------------|------|------|-------|-------|------|-------|-----|------|
| Conc Alhydrogel ( $\mu\text{g/ml}$ ) | 1                                                     | 2    | 3    | 4     | 5     | 6    | 7     | 8   | 9    |
| 0 (SFM)                              | 41.4                                                  | 15.7 | 8.7  | 98.2  | 25.4  | 7.7  | 70.2  | 3.2 | 7.5  |
| 2.5                                  | 44.0                                                  | 22.8 | 62.7 | 130.5 | 141.3 | 11.2 | 122.9 | 4.4 | 15.2 |
| 5                                    | 89.1                                                  | 27.1 | 50.3 | 100.8 | 38.7  | 21.0 | 80.6  | 2.9 | 13.9 |

**Table S3. Relative CellTiter data of M0, M1 and M2 macrophages obtained from donors 1-9 after incubation with increasing concentrations of Alhydrogel®. SFM stands for medium control.**

| <b>M0</b>               | <b>Donor 1-9</b> |      |      |      |      |      |      |      |      |
|-------------------------|------------------|------|------|------|------|------|------|------|------|
| Conc Alhydrogel (µg/ml) | 1                | 2    | 3    | 4    | 5    | 6    | 7    | 8    | 9    |
| 0 (SFM)                 | 1.00             | 1.00 | 1.00 | 1.00 | 1.00 | 1.00 | 1.00 | 1.00 | 1.00 |
| 2.5                     | 0.98             | 0.93 | 0.98 | 0.92 | 0.48 | 1.02 | 0.91 | 0.36 | 0.79 |
| 5                       | 0.80             | 0.79 | 1.04 | 0.96 | 0.46 | 0.94 | 0.79 | 0.26 | 0.68 |

| <b>M1</b>               | <b>Donor 1-9</b> |      |      |      |      |      |      |      |      |
|-------------------------|------------------|------|------|------|------|------|------|------|------|
| Conc Alhydrogel (µg/ml) | 1                | 2    | 3    | 4    | 5    | 6    | 7    | 8    | 9    |
| 0 (SFM)                 | 1.00             | 1.00 | 1.00 | 1.00 | 1.00 | 1.00 | 1.00 | 1.00 | 1.00 |
| 2.5                     | 0.79             | 0.75 | 0.96 | 0.77 | 0.43 | 0.94 | 0.94 | 0.43 | 0.61 |
| 5                       | 0.72             | 0.68 | 0.87 | 0.86 | 0.40 | 1.19 | 0.92 | 0.28 | 0.50 |

| <b>M2</b>               | <b>Donor 1-9</b> |      |      |      |      |      |      |      |      |
|-------------------------|------------------|------|------|------|------|------|------|------|------|
| Conc Alhydrogel (µg/ml) | 1                | 2    | 3    | 4    | 5    | 6    | 7    | 8    | 9    |
| 0 (SFM)                 | 1.00             | 1.00 | 1.00 | 1.00 | 1.00 | 1.00 | 1.00 | 1.00 | 1.00 |
| 2.5                     | 0.71             | 0.68 | 0.96 | 0.76 | 0.47 | 0.90 | 0.83 | 0.37 | 0.56 |
| 5                       | 0.61             | 0.72 | 1.04 | 1.02 | 0.43 | 0.86 | 0.92 | 0.32 | 0.55 |

**Table S4. Corrected lactate concentration ( $\mu\text{M}$ ) of M0, M1 and M2 macrophages from donors 1-9 after incubation with increasing concentrations of Alhydrogel®. SFM stands for medium control.**

| <b>M0</b>                            | <b>Donor 1-9 (lactate (<math>\mu\text{M}</math>))</b> |      |      |       |      |      |      |     |      |
|--------------------------------------|-------------------------------------------------------|------|------|-------|------|------|------|-----|------|
| Conc Alhydrogel ( $\mu\text{g/ml}$ ) | 1                                                     | 2    | 3    | 4     | 5    | 6    | 7    | 8   | 9    |
| 0 (SFM)                              | 39.8                                                  | 29.7 | 10.0 | 80.1  | 26.2 | 13.0 | 39.3 | 5.2 | 7.5  |
| 2.5                                  | 33.9                                                  | 31.4 | 14.1 | 124.9 | 85.8 | 14.2 | 79.3 | 2.5 | 10.5 |
| 5                                    | 69.6                                                  | 50.5 | 35.1 | 93.3  | 68.3 | 20.0 | 72.3 | 6.9 | 9.9  |

| <b>M1</b>                            | <b>Donor 1-9 (lactate (<math>\mu\text{M}</math>))</b> |      |      |       |      |      |      |      |      |
|--------------------------------------|-------------------------------------------------------|------|------|-------|------|------|------|------|------|
| Conc Alhydrogel ( $\mu\text{g/ml}$ ) | 1                                                     | 2    | 3    | 4     | 5    | 6    | 7    | 8    | 9    |
| 0 (SFM)                              | 23.1                                                  | 20.0 | 7.6  | 74.3  | 24.9 | 16.8 | 37.0 | 3.7  | 10.2 |
| 2.5                                  | 54.6                                                  | 38.7 | 19.5 | 129.4 | 53.7 | 14.0 | 42.2 | 23.0 | 39.3 |
| 5                                    | 75.1                                                  | 59.9 | 46.0 | 105.3 | 89.0 | 19.8 | 77.3 | 19.6 | 28.4 |

| <b>M2</b>                            | <b>Donor 1-9 (lactate (<math>\mu\text{M}</math>))</b> |      |      |       |       |      |       |      |      |
|--------------------------------------|-------------------------------------------------------|------|------|-------|-------|------|-------|------|------|
| Conc Alhydrogel ( $\mu\text{g/ml}$ ) | 1                                                     | 2    | 3    | 4     | 5     | 6    | 7     | 8    | 9    |
| 0 (SFM)                              | 41.4                                                  | 15.7 | 8.7  | 98.2  | 25.4  | 7.7  | 70.2  | 3.2  | 7.5  |
| 2.5                                  | 62.0                                                  | 33.5 | 65.3 | 171.7 | 300.6 | 12.4 | 148.1 | 11.9 | 27.1 |
| 5                                    | 146.1                                                 | 37.6 | 48.4 | 98.8  | 90.0  | 24.4 | 87.6  | 9.1  | 25.3 |

**Table S5. Lactate concentrations ( $\mu\text{M}$ ) of M0, M1 and M2 macrophages from donors 1-6 after incubation with increasing concentrations of PS-beads. SFM stands for medium control.**

| <b>M0</b>                          | <b>Donor 1-6 (lactate (<math>\mu\text{M}</math>))</b> |      |     |     |     |     |
|------------------------------------|-------------------------------------------------------|------|-----|-----|-----|-----|
| Conc PS-beads ( $\mu\text{g/ml}$ ) | 1                                                     | 2    | 3   | 4   | 5   | 6   |
| 0 (SFM)                            | 39.3                                                  | 26.5 | 5.2 | 7.5 | 6.1 | 2.0 |
| 10                                 | 65.7                                                  | 34.2 | 1.3 | 4.5 | 9.5 | 3.0 |
| 20                                 |                                                       | 16.5 | 0.5 | 8.0 | 6.2 | 4.3 |

| <b>M1</b>                          | <b>Donor 1-6 (lactate (<math>\mu\text{M}</math>))</b> |      |     |      |      |     |
|------------------------------------|-------------------------------------------------------|------|-----|------|------|-----|
| Conc PS-beads ( $\mu\text{g/ml}$ ) | 1                                                     | 2    | 3   | 4    | 5    | 6   |
| 0 (SFM)                            | 37.0                                                  | 42.3 | 3.7 | 10.2 | 6.4  | 2.2 |
| 10                                 | 41.9                                                  | 37.6 | 2.0 | 7.8  | 10.2 | 3.3 |
| 20                                 |                                                       | 13.5 | 1.7 | 12.0 | 8.0  | 3.3 |

| <b>M2</b>                          | <b>Donor 1-6 (lactate (<math>\mu\text{M}</math>))</b> |      |     |      |     |     |
|------------------------------------|-------------------------------------------------------|------|-----|------|-----|-----|
| Conc PS-beads ( $\mu\text{g/ml}$ ) | 1                                                     | 2    | 3   | 4    | 5   | 6   |
| 0 (SFM)                            | 70.2                                                  | 30.2 | 3.2 | 7.5  | 5.9 | 2.6 |
| 10                                 | 92.8                                                  | 58.6 | 2.1 | 8.4  | 7.3 | 3.4 |
| 20                                 |                                                       | 40.3 | 3.7 | 11.5 | 6.3 | 2.5 |

**Table S6. Relative CellTiter data of M0, M1 and M2 macrophages obtained from donors 1-6 after incubation with increasing concentrations of PS-beads. SFM stands for medium control.**

| <b>M0</b>                             | <b>Donor 1-6</b> |      |      |      |      |      |
|---------------------------------------|------------------|------|------|------|------|------|
| Conc PS-beads<br>( $\mu\text{g/ml}$ ) | 1                | 2    | 3    | 4    | 5    | 6    |
| 0 (SFM)                               | 1.00             | 1.00 | 1.00 | 1.00 | 1.00 | 1.00 |
| 10                                    | 0.98             | 0.86 | 0.31 | 0.53 | 1.11 | 0.90 |
| 20                                    |                  | 0.60 | 0.23 | 0.51 | 1.04 | 1.00 |

| <b>M1</b>                             | <b>Donor 1-6</b> |      |      |      |      |      |
|---------------------------------------|------------------|------|------|------|------|------|
| Conc PS-beads<br>( $\mu\text{g/ml}$ ) | 1                | 2    | 3    | 4    | 5    | 6    |
| 0 (SFM)                               | 1.00             | 1.00 | 1.00 | 1.00 | 1.00 | 1.00 |
| 10                                    | 1.04             | 0.90 | 0.30 | 0.50 | 0.92 | 0.65 |
| 20                                    |                  | 0.72 | 0.27 | 0.48 | 0.86 | 0.89 |

| <b>M2</b>                             | <b>Donor 1-6</b> |      |      |      |      |      |
|---------------------------------------|------------------|------|------|------|------|------|
| Conc PS-beads<br>( $\mu\text{g/ml}$ ) | 1                | 2    | 3    | 4    | 5    | 6    |
| 0 (SFM)                               | 1.00             | 1.00 | 1.00 | 1.00 | 1.00 | 1.00 |
| 10                                    | 0.94             | 0.91 | 0.31 | 0.55 | 1.11 | 0.77 |
| 20                                    |                  | 0.62 | 0.30 | 0.41 | 0.94 | 1.14 |

**Table S7. Corrected lactate concentration ( $\mu\text{M}$ ) of M0, M1 and M2 macrophages from donors 1-6 after incubation with increasing concentrations of PS-beads. SFM stands for medium control.**

| <b>M0</b>                          | <b>Donor 1-6 (lactate (<math>\mu\text{M}</math>))</b> |      |     |      |     |     |
|------------------------------------|-------------------------------------------------------|------|-----|------|-----|-----|
| Conc PS-beads ( $\mu\text{g/ml}$ ) | 1                                                     | 2    | 3   | 4    | 5   | 6   |
| 0 (SFM)                            | 39.3                                                  | 26.5 | 5.2 | 7.5  | 6.1 | 2.0 |
| 10                                 | 67.0                                                  | 39.8 | 4.2 | 8.5  | 8.6 | 3.3 |
| 20                                 |                                                       | 27.5 | 2.2 | 15.7 | 6.0 | 4.3 |

| <b>M1</b>                          | <b>Donor 1-6 (lactate (<math>\mu\text{M}</math>))</b> |      |     |      |      |     |
|------------------------------------|-------------------------------------------------------|------|-----|------|------|-----|
| Conc PS-beads ( $\mu\text{g/ml}$ ) | 1                                                     | 2    | 3   | 4    | 5    | 6   |
| 0 (SFM)                            | 37.0                                                  | 42.3 | 3.7 | 10.2 | 6.4  | 2.2 |
| 10                                 | 40.3                                                  | 6.3  | 6.7 | 15.6 | 11.1 | 5.1 |
| 20                                 |                                                       | 18.8 | 6.3 | 25.0 | 9.3  | 3.7 |

| <b>M2</b>                          | <b>Donor 1-6 (lactate (<math>\mu\text{M}</math>))</b> |      |      |      |     |     |
|------------------------------------|-------------------------------------------------------|------|------|------|-----|-----|
| Conc PS-beads ( $\mu\text{g/ml}$ ) | 1                                                     | 2    | 3    | 4    | 5   | 6   |
| 0 (SFM)                            | 70.2                                                  | 30.2 | 3.2  | 7.5  | 5.9 | 2.6 |
| 10                                 | 98.7                                                  | 64.4 | 6.8  | 15.3 | 6.6 | 4.4 |
| 20                                 |                                                       | 65.0 | 12.3 | 28.0 | 6.7 | 2.2 |
